# Supplementary material for: Carbon dioxide uptake by [Cu(bpca)]+: synthesis, crystal structure, and magnetic properties of {[Na(H2O)2][Cu2(bpca)2(CO3)(HCO3)]}n [Hbpca = bis(2-pyridylcarbonyl)amide]
Source: Royal Society of Chemistry journal article supplement (doi:10.1039/d2nj05268g), 2022-12-06
Supplement: d2nj05268g1.pdf [file d2nj05268g1.pdf]

**Carbon Dioxide Uptake by [Cu(bpca)]<sup>+</sup>: Synthesis, Crystal Structure, and Magnetic Properties of {[Na(H<sub>2</sub>O)<sub>2</sub>][Cu<sub>2</sub>(bpca)<sub>2</sub>(CO<sub>3</sub>)(HCO<sub>3</sub>)]<sub>n</sub> [Hbpca = Bis(2-pyridylcarbonyl)amide]**

Rafaela M. R. da Silva,<sup>a</sup> Iara M.L. Rosa,<sup>a</sup> Willian X. C. Oliveira,<sup>b</sup> Odivaldo Cambraia Alves,<sup>c</sup> Evelyn C.S. Santos,<sup>d</sup> Flávio Garcia,<sup>d</sup> Henrique C. Silva Junior,<sup>c</sup> Glaucio B. Ferreira,<sup>c</sup> Guilherme P. Guedes,<sup>c</sup> Wallace D. do Pim,<sup>e</sup> Miguel Julve,<sup>f\*</sup> and Maria Vanda Marinho.<sup>a\*</sup>

<sup>a</sup>*Instituto de Química, Universidade Federal de Alfenas, Campus Santa Clara, Alfenas, MG, 37133-840, Brazil. [maria.marinho@unifal-mg.edu.br](mailto:maria.marinho@unifal-mg.edu.br)*

<sup>b</sup>*Departamento de Química - ICEx, Universidade Federal de Minas Gerais, Campus Pampulha, Belo Horizonte, MG, 31270-901, Brazil.*

<sup>c</sup>*Instituto de Química, Universidade Federal Fluminense, Niterói, Rio de Janeiro, RJ 24020-141, Brazil.*

<sup>d</sup>*Centro Brasileiro de Pesquisas Físicas (CBPF), Urca, Rio de Janeiro, RJ 22290-180, Brazil.*

<sup>e</sup>*Departamento de Química, Centro Federal de Educação Tecnológica de Minas Gerais, Belo Horizonte, MG, 30421-169, Brazil.*

<sup>f</sup>*Instituto de Ciencia Molecular (ICMol)/Departament de Química Inorgànica, Universitat de Valencia, C/ Catedrático José Beltrán 2, 46980 Paterna, València, Spain. [miguel.julve@uv.es](mailto:miguel.julve@uv.es)*

**Table S1.** Polymeric chains containing the [Cu(bpca)]<sup>+</sup> unit in the last 45 years.

| Compound | Formula                                                                  | Metal ion<br>Counter ion<br>Geometry                                               | Reagents*                                                                           | Methodology      | Year | Reference |
|----------|--------------------------------------------------------------------------|------------------------------------------------------------------------------------|-------------------------------------------------------------------------------------|------------------|------|-----------|
| 1        | [Cu{(NC <sub>5</sub> H <sub>4</sub> CO) <sub>2</sub> N}]ClO <sub>4</sub> | Cu <sup>2+</sup><br>ClO <sub>4</sub> <sup>-</sup><br>trigonal bipyramidal          | [Cu(H <sub>2</sub> O) <sub>6</sub> ][ClO <sub>4</sub> ] <sub>2</sub> ; tptz         | Stirring/heating | 1988 | [1]       |
| 2        | Cu(bpca)(CN)                                                             | Cu <sup>2+</sup><br>CN <sup>-</sup><br>square pyramidal                            | Cu(bpca) <sub>2</sub> ·H <sub>2</sub> O; NaCN                                       | Stirring/heating | 2005 | [2]       |
| 3        | [Cu(bpca)](ClO <sub>4</sub> )                                            | Cu <sup>2+</sup><br>ClO <sub>4</sub> <sup>-</sup><br>trigonal bipyramidal          | Cu(bpca)(N <sub>3</sub> ); Fe(ClO <sub>4</sub> ) <sub>3</sub> ·H <sub>2</sub> O     | Stirring/heating | 2055 | [2]       |
| 4        | [Cu(bpcam)(CN)(H <sub>2</sub> O)]                                        | Cu <sup>2+</sup><br>CN <sup>-</sup><br>square pyramidal                            | [Cu(bpcam)(H <sub>2</sub> O) <sub>3</sub> ]NO <sub>3</sub> ·2H <sub>2</sub> O; KCN  | Diffusion        | 2008 | [3]       |
| 5        | [Cu(bpca)(tcm)] <sub>n</sub>                                             | Cu <sup>2+</sup><br>C <sub>4</sub> N <sub>3</sub> <sup>-</sup><br>square pyramidal | [Cu(bpcam)(H <sub>2</sub> O) <sub>3</sub> ]NO <sub>3</sub> ·2H <sub>2</sub> O; Ktcm | Diffusion        | 2008 | [3]       |
| 6        | [Cu(bpcam)(tcm)] <sub>n</sub>                                            | Cu <sup>2+</sup><br>C <sub>4</sub> N <sub>3</sub> <sup>-</sup><br>square pyramidal | [Cu(bpcam)(H <sub>2</sub> O) <sub>3</sub> ]NO <sub>3</sub> ·2H <sub>2</sub> O; Ktcm | Diffusion        | 2008 | [4]       |
| 7        | [(BPCA)Cu(MA)]                                                           | Cu <sup>2+</sup><br>MA <sup>-</sup><br>square pyramidal                            | HBPCA; Cu(ClO <sub>4</sub> ) <sub>2</sub> ·6H <sub>2</sub> O; HMA                   | Stirring/heating | 2010 | [5]       |
| 8        | [(BPCA)Cu(MPA)(H <sub>2</sub> O)]                                        | Cu <sup>2+</sup><br>MPA <sup>-</sup><br>square pyramidal                           | HBPCA; Cu(ClO <sub>4</sub> ) <sub>2</sub> ·6H <sub>2</sub> O; HMPA                  | Stirring/heating | 2010 | [5]       |
| 9        | [(BPCA)Cu(BA)] <sub>n</sub>                                              | Cu <sup>2+</sup><br>BA <sup>-</sup>                                                | HBPCA; Cu(ClO <sub>4</sub> ) <sub>2</sub> ·6H <sub>2</sub> O; HBA                   | Stirring/heating | 2010 | [5]       |

|    |                                                                                 |                                              |                                                                                                                              |                  |      |     |
|----|---------------------------------------------------------------------------------|----------------------------------------------|------------------------------------------------------------------------------------------------------------------------------|------------------|------|-----|
|    |                                                                                 | square pyramidal<br>Cu <sup>2+</sup>         |                                                                                                                              |                  |      |     |
| 10 | [Cu(bpca)(CF <sub>3</sub> SO <sub>3</sub> )(H <sub>2</sub> O)]·H <sub>2</sub> O | CFSO <sub>3</sub> <sup>-</sup>               | Cu(CF <sub>3</sub> SO <sub>3</sub> ) <sub>2</sub> ; tptz                                                                     | Stirring/heating | 2013 | [6] |
|    |                                                                                 | square pyramidal<br>Cu <sup>2+</sup>         |                                                                                                                              |                  |      |     |
| 11 | [Cu(bpca)(EtH <sub>2</sub> opba)] <sub>n</sub>                                  | CFSO <sub>3</sub> <sup>-</sup><br>Octahedral | [Cu(bpca)(CF <sub>3</sub> SO <sub>3</sub> )(H <sub>2</sub> O)]·H <sub>2</sub> O; EtH <sub>2</sub> opba                       | Stirring/heating | 2013 | [6] |
|    |                                                                                 | Cu <sup>2+</sup>                             |                                                                                                                              |                  |      |     |
| 12 | [Cu(bpca)Cl] <sub>n</sub>                                                       | Cl <sup>-</sup>                              | [Cu(tptz)Cl <sub>2</sub> ]·2H <sub>2</sub> O                                                                                 | Stirring/heating | 2014 | [7] |
|    |                                                                                 | square pyramidal<br>Cu <sup>2+</sup>         |                                                                                                                              |                  |      |     |
| 13 | [{Cu(bpca)} <sub>2</sub> {Pd(opba)}]·1.75dmsO·0,25H <sub>2</sub> O              | opba <sup>-</sup><br>Square planar           | [Cu(bpca)(H <sub>2</sub> O) <sub>2</sub> ]NO <sub>3</sub> ·2H <sub>2</sub> O;<br>K <sub>2</sub> [Pd(opba)]·2H <sub>2</sub> O | Stirring/heating | 2015 | [8] |
|    |                                                                                 | Cu <sup>2+</sup>                             |                                                                                                                              |                  |      |     |
| 14 | {[Cu(bpca)} <sub>2</sub> {Pd(opba)}] } <sub>n</sub>                             | opba <sup>-</sup><br>Square planar           | [Cu(bpca)(H <sub>2</sub> O) <sub>2</sub> ]NO <sub>3</sub> ·2H <sub>2</sub> O;<br>K <sub>2</sub> [Pd(opba)]·2H <sub>2</sub> O | Stirring/heating | 2015 | [8] |
|    |                                                                                 | Cu <sup>2+</sup>                             |                                                                                                                              |                  |      |     |
| 15 | [{Cu(bpca)} <sub>2</sub> (H <sub>2</sub> ppba)]·1.33dmf·0.66dmsO } <sub>n</sub> | ppba <sup>-</sup><br>Octahedral              | [{K <sub>2</sub> (H <sub>2</sub> O) <sub>2</sub> } {Pd <sub>2</sub> (ppba) <sub>2</sub> }]                                   | Diffusion        | 2016 | [9] |

\*Abbreviations: NC<sub>5</sub>H<sub>4</sub>CO = bpca= bis(2-pyridylcarbonyl)amidate; bpcam = bis(2-pyrimidylcarbonyl)amidate; tptz = 2,4,6-Tris(2-pyridyl)-1,3,5-triazine; tcm = tricyanomethanide; MA = racemic mandelate; MPA = racemic a-methoxy phenylacetate; BA = benzilate anion; H<sub>4</sub>opba = N,N'-1,2-phenylenebis(oxamic acid); EtH<sub>3</sub>opba = monoethyl ester derivative of the H<sub>4</sub>opba; H<sub>4</sub>mpba = 1,3-phenylenebis(oxamic acid); H<sub>4</sub>opba = 1,2- phenylenebis(oxamic acid); Hbpca = bis(2-pyridylcarbonyl)amide; dmsO = dimethyl sulfoxide; = dimethylformamide; H<sub>4</sub>ppba = N,N'-1,4-phenylenebis(oxamic acid).

**Table S2.** Values of the spin moment calculated for the singlet and nonet states of **1**.

| <b>Singlet state</b>   |                       |                       |                       |                       |                       |
|------------------------|-----------------------|-----------------------|-----------------------|-----------------------|-----------------------|
| <b>Spin Density</b>    |                       |                       |                       |                       |                       |
| <b>Cu<sub>2</sub></b>  | <b>N<sub>5</sub></b>  | <b>N<sub>4</sub></b>  | <b>N<sub>6</sub></b>  | <b>O<sub>8</sub></b>  | <b>O<sub>9</sub></b>  |
| 0.622                  | 0.076                 | 0.069                 | 0.067                 | 0.115                 | 0.004                 |
| <b>Cu<sub>1</sub></b>  | <b>N<sub>2</sub></b>  | <b>N<sub>1</sub></b>  | <b>N<sub>3</sub></b>  | <b>O<sub>5</sub></b>  | <b>O<sub>6</sub></b>  |
| 0.660                  | 0.085                 | 0.074                 | 0.078                 | 0.063                 | 0.000                 |
| <b>Cu<sub>2</sub>'</b> | <b>N<sub>5</sub>'</b> | <b>N<sub>4</sub>'</b> | <b>N<sub>6</sub>'</b> | <b>O<sub>8</sub>'</b> | <b>O<sub>9</sub>'</b> |
| 0.622                  | 0.076                 | 0.069                 | 0.067                 | 0.115                 | 0.004                 |
| <b>Cu<sub>1</sub>'</b> | <b>N<sub>2</sub>'</b> | <b>N<sub>1</sub>'</b> | <b>N<sub>3</sub>'</b> | <b>O<sub>5</sub>'</b> | <b>O<sub>6</sub>'</b> |
| 0.660                  | 0.085                 | 0.074                 | 0.078                 | 0.063                 | 0.000                 |
| <b>Nonet state</b>     |                       |                       |                       |                       |                       |
| <b>Spin Density</b>    |                       |                       |                       |                       |                       |
| <b>Cu<sub>2</sub></b>  | <b>N<sub>5</sub></b>  | <b>N<sub>4</sub></b>  | <b>N<sub>6</sub></b>  | <b>O<sub>8</sub></b>  | <b>O<sub>9</sub></b>  |
| -0.622                 | -0.076                | -0.069                | -0.067                | -0.115                | -0.004                |
| <b>Cu<sub>1</sub></b>  | <b>N<sub>2</sub></b>  | <b>N<sub>1</sub></b>  | <b>N<sub>3</sub></b>  | <b>O<sub>5</sub></b>  | <b>O<sub>6</sub></b>  |
| -0.660                 | -0.085                | -0.074                | -0.078                | -0.063                | -0.000                |
| <b>Cu<sub>2</sub>'</b> | <b>N<sub>5</sub>'</b> | <b>N<sub>4</sub>'</b> | <b>N<sub>6</sub>'</b> | <b>O<sub>8</sub>'</b> | <b>O<sub>9</sub>'</b> |
| 0.622                  | 0.076                 | 0.069                 | 0.067                 | 0.115                 | 0.004                 |
| <b>Cu<sub>1</sub>'</b> | <b>N<sub>2</sub>'</b> | <b>N<sub>1</sub>'</b> | <b>N<sub>3</sub>'</b> | <b>O<sub>5</sub>'</b> | <b>O<sub>6</sub>'</b> |
| 0.660                  | 0.085                 | 0.074                 | 0.078                 | 0.063                 | 0.000                 |

**Table S3.** Values of the spin moment calculated for nonet state of **1** with a totally antiferromagnetic organization.

| <b>Nonet state</b>     |                       |                       |                       |                       |                       |
|------------------------|-----------------------|-----------------------|-----------------------|-----------------------|-----------------------|
| <b>Spin Density</b>    |                       |                       |                       |                       |                       |
| <b>Cu<sub>2</sub></b>  | <b>N<sub>5</sub></b>  | <b>N<sub>4</sub></b>  | <b>N<sub>6</sub></b>  | <b>O<sub>8</sub></b>  | <b>O<sub>9</sub></b>  |
| 0.623                  | 0.076                 | 0.070                 | 0.067                 | 0.115                 | 0.005                 |
| <b>Cu<sub>1</sub></b>  | <b>N<sub>2</sub></b>  | <b>N<sub>1</sub></b>  | <b>N<sub>3</sub></b>  | <b>O<sub>5</sub></b>  | <b>O<sub>6</sub></b>  |
| -0.659                 | -0.085                | -0.074                | -0.078                | -0.063                | -0.000                |
| <b>Cu<sub>2</sub>'</b> | <b>N<sub>5</sub>'</b> | <b>N<sub>4</sub>'</b> | <b>N<sub>6</sub>'</b> | <b>O<sub>8</sub>'</b> | <b>O<sub>9</sub>'</b> |
| -0.623                 | -0.076                | -0.070                | -0.067                | -0.115                | -0.005                |
| <b>Cu<sub>1</sub>'</b> | <b>N<sub>2</sub>'</b> | <b>N<sub>1</sub>'</b> | <b>N<sub>3</sub>'</b> | <b>O<sub>5</sub>'</b> | <b>O<sub>6</sub>'</b> |
| 0.659                  | 0.085                 | 0.074                 | 0.078                 | 0.063                 | 0.000                 |

**Table S4.** Values of the spin moment calculated for nonet state of **1** in antiferromagnetic chains but with a ferromagnetic organization between them.

| Nonet state<br>Spin Density |                       |                       |                       |                       |                       |
|-----------------------------|-----------------------|-----------------------|-----------------------|-----------------------|-----------------------|
| <b>Cu<sub>2</sub></b>       | <b>N<sub>5</sub></b>  | <b>N<sub>4</sub></b>  | <b>N<sub>6</sub></b>  | <b>O<sub>8</sub></b>  | <b>O<sub>9</sub></b>  |
| -0.623                      | -0.076                | -0.070                | -0.067                | -0.115                | -0.004                |
| <b>Cu<sub>1</sub></b>       | <b>N<sub>2</sub></b>  | <b>N<sub>1</sub></b>  | <b>N<sub>3</sub></b>  | <b>O<sub>5</sub></b>  | <b>O<sub>6</sub></b>  |
| 0.659                       | 0.085                 | 0.074                 | 0.078                 | 0.063                 | 0.000                 |
| <b>Cu<sub>2'</sub></b>      | <b>N<sub>5'</sub></b> | <b>N<sub>4'</sub></b> | <b>N<sub>6'</sub></b> | <b>O<sub>8'</sub></b> | <b>O<sub>9'</sub></b> |
| -0.623                      | -0.076                | -0.070                | -0.067                | -0.115                | -0.004                |
| <b>Cu<sub>1'</sub></b>      | <b>N<sub>2'</sub></b> | <b>N<sub>1'</sub></b> | <b>N<sub>3'</sub></b> | <b>O<sub>5'</sub></b> | <b>O<sub>6'</sub></b> |
| 0.659                       | 0.085                 | 0.074                 | 0.078                 | 0.063                 | 0.000                 |

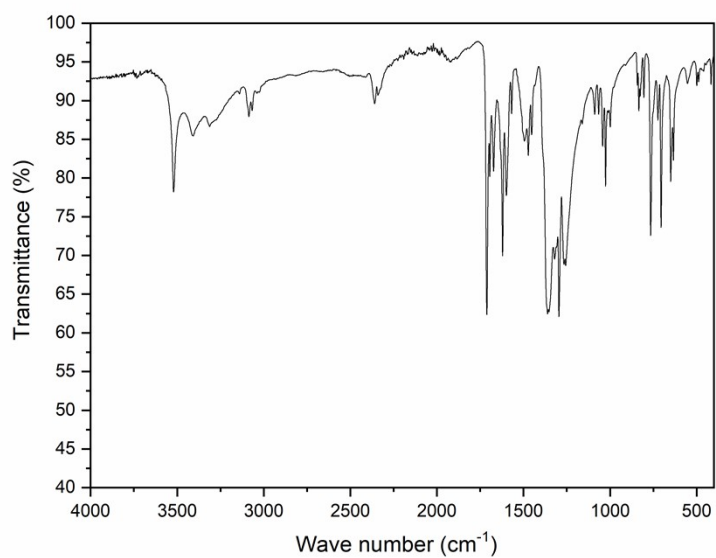

**Figure S1.** IR spectrum of **1**.

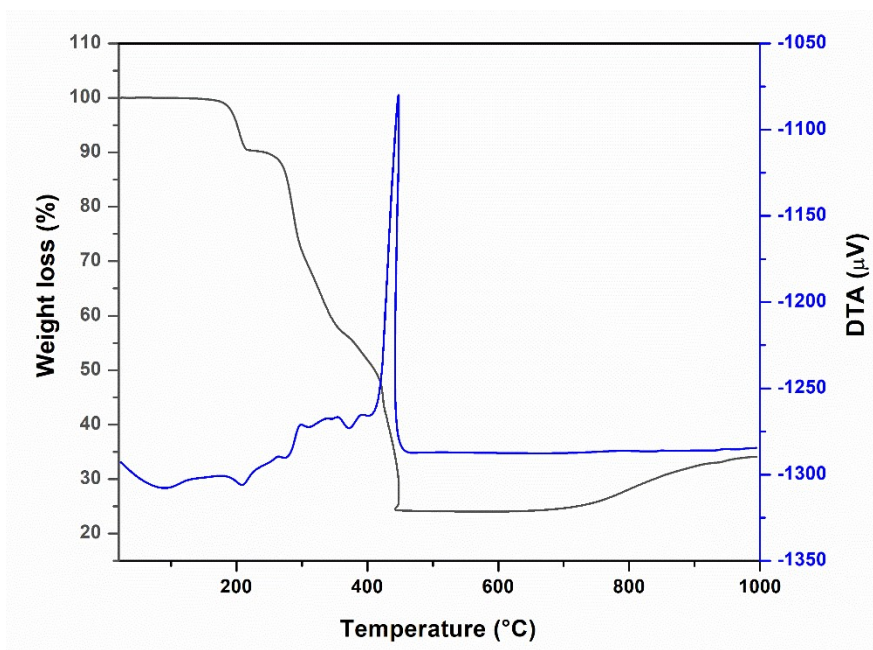

**Figure S2.** TG and DTA curves for **1**.

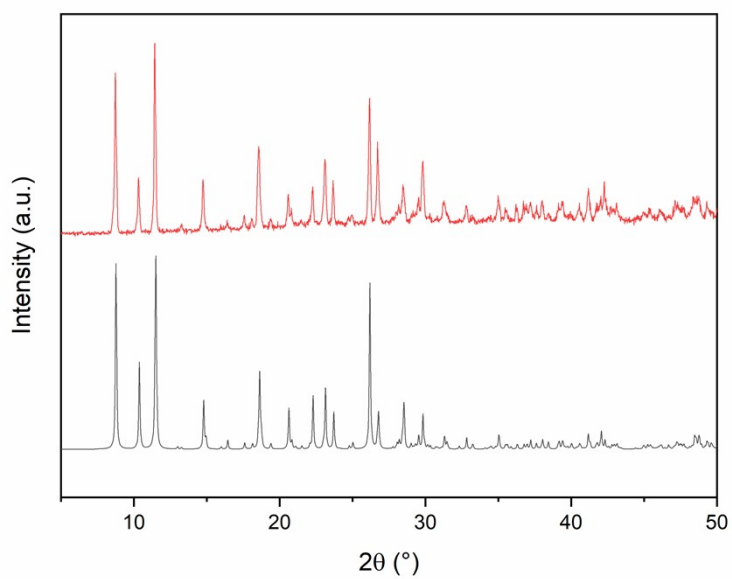

**Figure S3.** PXRD calculated (black) and experimental (red) patterns of **1**.

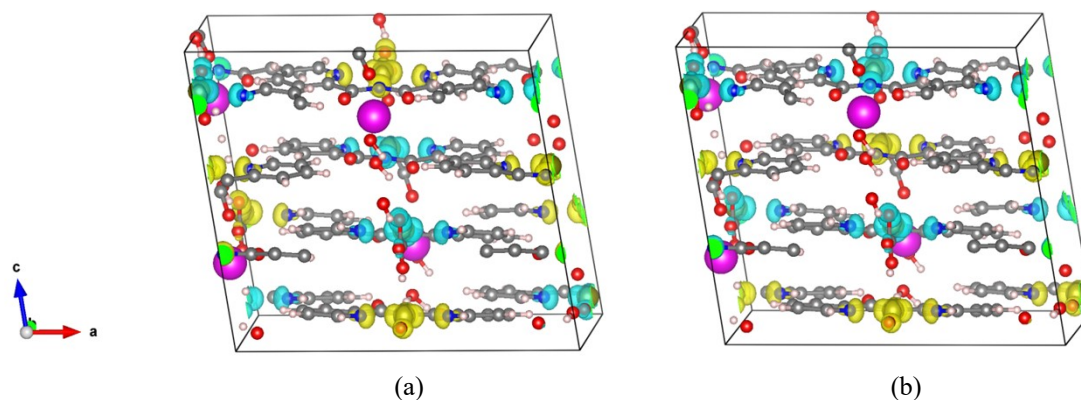

**Figure S4.** Spin moment in the unit cell of **1** for the singlet state ( $E_{BS}$ ) (a) totally antiferromagnetic and (b) with antiferromagnetic chains but with a ferromagnetic organization between them. Atoms are represented by CPK color scheme: carbon (grey) oxygen (red), nitrogen (blue), copper (olive), pink (Na), hydrogen (white), positive spin density (yellow), and negative spin density (blue).

## References

1. A. Cantarero, J. M. Amigó, J. Faus, M. Julve and T. J. Debaerdemaeker. *J Chem Soc., Dalton Trans*, 1988, **8**, 2033-2039.
2. H. Casellas, F. Costantino, A. Mandonnet, A. Caneschi and D. Gatteschi. *Inorg Chim Acta*, 2005, **358**, 177–185.
3. D. C. de Castro Gomes, L. M. Toma, H. O. Stumpf, H. Adams, J. A. Thomas, F. Lloret and M. Julve. *Polyhedron*, 2008, **27**, 559–573.
4. C. Yuste, D. C. de Castro Gomes, H. Adams, J. A. Thomas, F. Lloret and M. Julve. *Polyhedron*, 2008, **27**, 2577–2584.
5. P. Halder, E. Zangrando and T. K. Paine. *Polyhedron*, 2010, **29**, 434–440.
6. T. R. G. Simões, R. V. Mambrini, D. O. Reis, M. V. Marinho, M. A. Ribeiro, C. B. Pinheiro, J. Ferrando-Soria, M. Déniz, C. Ruiz-Pérez, D. Cangussu, H. O. Stumpf, F. Lloret and M. Julve. *J Chem Soc., Dalton Trans*, 2013, **42**, 5778–5795.
7. K. Abdi, H. Hadadzadeh, M. Weil and H. A. Rudbari. *Inorg Chim Acta*, 2014, **416**, 109–121.
8. W. X. C. Oliveira, M. A. Ribeiro, C. B. Pinheiro, M. M. da Costa, A. P. S. Fontes, W. C. Nunes, D. Cangussu, M. Julve, H. O. Stumpf and C. L. M. Pereira. *Cryst Growth Des*, 2015, **15**, 1325–1335.
9. W. X. C. Oliveira, C. B. Pinheiro, M. M. da Costa, A. P. S. Fontes, W. C. Nunes, F. Lloret, M. Julve and C. L. M. Pereira. *Cryst Growth Des*, 2016, **16**, 4094-4107.
